# Supplementary material
Source: Springer Nature journal article supplement (https://cris.unibo.it/retrieve/2406b9b8-b30c-4c88-89b8-4b3db3de9b91/file%20supplementari%20%282%29.zip)
Supplement: MOESM1 [file 44187_2026_957_MOESM1_ESM.pdf › 44187_2026_957_MOESM1_ESM.pdf]

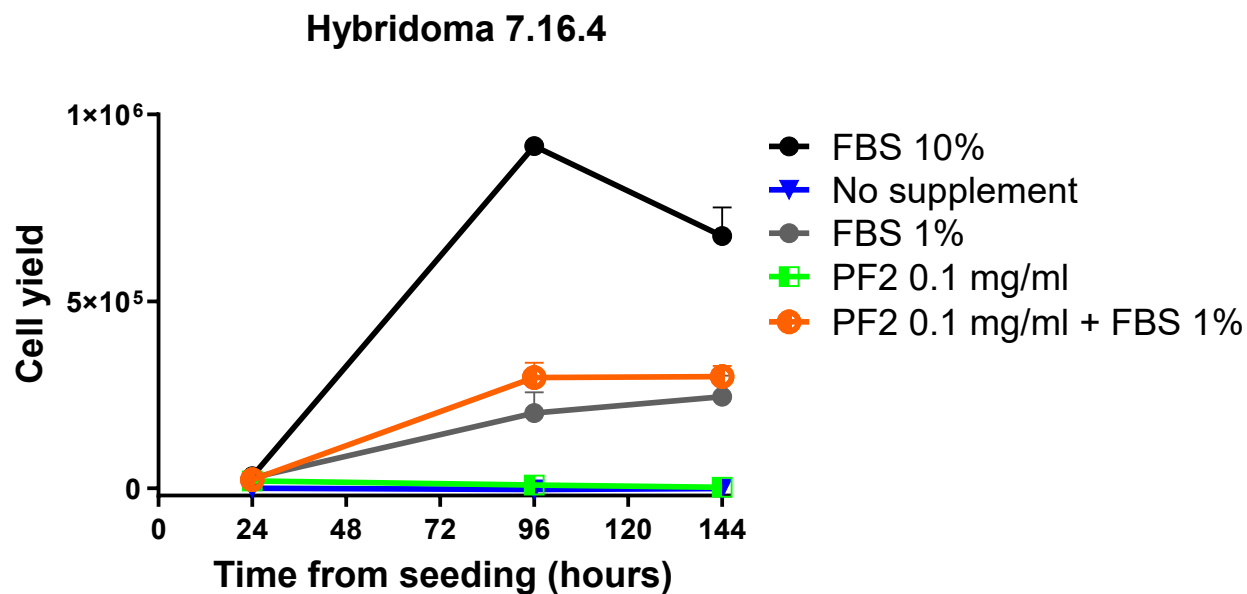

#### Supplementary Fig. 1

Growth of the hybridoma 7.16.4 cells enriched with different concentrations of PF2 fraction and/or 1% FBS, determined by haemocytometric count. Cell yield was determined as the total number of cells per well (1.9 cm<sup>2</sup>). Each point represents the mean with the SEM; n=2 biological replicates at least.
