# Supplementary material
Source: Springer Nature journal article supplement (https://cris.unibo.it/retrieve/2406b9b8-b30c-4c88-89b8-4b3db3de9b91/file%20supplementari%20%282%29.zip)
Supplement: MOESM2 [file 44187_2026_957_MOESM2_ESM.pdf › 44187_2026_957_MOESM2_ESM.pdf]

**Supplementary Table 1.** Peptides identified by Ultra Performance Liquid Chromatography coupled to a high-resolution Mass Spectrometry system (UPLC/MS Vlon). Data were processed using UNIFI software (Waters, Milford, Massachusetts, USA).

| Sample | Source protein name | Fragment label | Peptide                  | Modifiers       |
|--------|---------------------|----------------|--------------------------|-----------------|
| F10#1  | κ-casein            | 1:F162-169     | VQVTSTAV                 |                 |
| F3     | κ-casein            | 1:F106-124&    | MAIPPKKNQDKTEIPTINT      | Oxidation M [1] |
| F3     | κ-casein            | 1:F106-124     | MAIPPKKNQDKTEIPTINT      |                 |
| F3     | α-S1-casein         | 1:F1-23        | RPKHPIKHQGLPQEVLENENLLRF |                 |
| F3     | κ-casein            | 1:F162-169     | VQVTSTAV                 |                 |
| F3     | β-casein            | 1:F193-209     | YQEPVLGPVRGPFPIIV        |                 |
| PF1    | κ-casein            | 1:F106-124&    | MAIPPKKNQDKTEIPTINT      | Oxidation M [1] |
| PF1    | κ-casein            | 1:F106-124     | MAIPPKKNQDKTEIPTINT      |                 |
| PF1    | κ-casein            | 1:F106-126     | MAIPPKKNQDKTEIPTINTIA    |                 |
| PF1    | α-S1-casein         | 1:F1-23        | RPKHPIKHQGLPQEVLENENLLRF |                 |
| PF1    | Fibronectin         | 1:F577-581     | TSGPV                    |                 |
| PF1    | κ-casein            | 1:F162-169     | VQVTSTAV                 |                 |
| PF1    | β-casein            | 1:F193-209     | YQEPVLGPVRGPFPIIV        |                 |
| PF2    | β-casein            | 1:F192-209     | LYQEPVLGPVRGPFPIIV       |                 |
| PF2    | κ-casein            | 1:F106-124&    | MAIPPKKNQDKTEIPTINT      | Oxidation M [1] |
| PF2    | κ-casein            | 1:F106-124     | MAIPPKKNQDKTEIPTINT      |                 |
| PF2    | α-S1-casein         | 1:F1-20        | RPKHPIKHQGLPQEVLENENL    |                 |
| PF2    | κ-casein            | 1:F162-169     | VQVTSTAV                 |                 |
| PF2    | β-casein            | 1:F193-209     | YQEPVLGPVRGPFPIIV        |                 |
| PF3    | β-casein            | 1:F192-209     | LYQEPVLGPVRGPFPIIV       |                 |
| PF3    | α-S1-casein         | 1:F1-23        | RPKHPIKHQGLPQEVLENENLLRF |                 |
| PF3    | β-casein            | 1:F193-209     | YQEPVLGPVRGPFPIIV        |                 |
| PF10   | α-S1-casein         | 1:F24-29       | FVAPFP                   |                 |
| PF10   | α-S1-casein         | 1:F24-30       | FVAPFPE                  |                 |
| PF10   | α-S1-casein         | 1:F10-16       | GLPQEV                   |                 |

|      |                     |              |                                   |                         |
|------|---------------------|--------------|-----------------------------------|-------------------------|
| PF10 | $\alpha$ -S1-casein | 1:F10-17     | GLPQEVLN                          |                         |
| PF10 | $\beta$ -casein     | 1:F203-209   | GPFPPIV                           |                         |
| PF10 | $\kappa$ -casein    | 1:F106-123&  | MAIPPKKNQDKTEIPTIN                | Oxidation M [1]         |
| PF10 | $\kappa$ -casein    | 1:F106-126&  | MAIPPKKNQDKTEIPTINTIA             | Oxidation M [1]         |
| PF10 | $\alpha$ -S1-casein | 1:F17-21     | NENLL                             |                         |
| PF10 | $\beta$ -casein     | 1:F73-96     | NIPPLTQTPVVVPPFLQPEVMGVS          |                         |
| PF10 | $\beta$ -casein     | 1:F73-105&   | NIPPLTQTPVVVPPFLQPEVMGVSKVKEAMAPK | Oxidation M (2) [21 30] |
| PF10 | Fibronectin         | 1:F1234-1238 | PEVPQ                             |                         |
| PF10 | $\beta$ -casein     | 1:F63-68     | PGPIP                             |                         |
| PF10 | $\kappa$ -casein    | 1:F156-163   | PPEINTVQ                          |                         |
| PF10 | $\beta$ -casein     | 1:F85-91     | PPFLQPE                           |                         |
| PF10 | $\beta$ -casein     | 1:F85-96&    | PPFLQPEVMGVS                      | Oxidation M [9]         |
| PF10 | $\beta$ -casein     | 1:F85-96     | PPFLQPEVMGVS                      |                         |
| PF10 | $\kappa$ -casein    | 1:F134-142   | PTTEAVEST                         |                         |
| PF10 | $\beta$ -casein     | 1:F57-61     | SLVYP                             |                         |
| PF10 | $\beta$ -casein     | 1:F57-63     | SLVYPFP                           |                         |
| PF10 | $\kappa$ -casein    | 1:F155-160   | SPPEIN                            |                         |
| PF10 | $\kappa$ -casein    | 1:F155-161   | SPPEINT                           |                         |
| PF10 | $\kappa$ -casein    | 1:F155-163   | SPPEINTVQ                         |                         |
| PF10 | Fibronectin         | 1:F577-581   | TSGPV                             |                         |
| PF10 | $\kappa$ -casein    | 1:F152-160   | VIESPPEIN                         |                         |
| PF10 | $\beta$ -casein     | 1:F193-209   | YQEPVLGPVRGPFPIV                  |                         |
